# Supplementary material for: Aliphatic Carbonyl Compounds (C 8 –C 26 ) in Wintertime Atmospheric Aerosol in London, UK
Source: Copernicus journal article supplement (doi:10.5194/acp-2018-769), 2018-09-03
Supplement: Supplementary file 1 [file acp-2018-769-supplement.pdf]

1  
2  
3  
4  
5  
6  
7  
8  
9  
10  
11

## **SUPPORTING INFORMATION**

### **Aliphatic Carbonyl Compounds (C<sub>8</sub>-C<sub>26</sub>) in Wintertime Atmospheric Aerosol in London, UK**

**Ruihe Lyu, Mohammed Salim Alam, Christopher Stark, Ruixin Xu, Zongbo Shi, Yinchang Feng and Roy M. Harrison**

12 Table S1. Concentrations (ng m<sup>-3</sup>) in particulate (P) and gaseous (G) forms

| RU (Regent University, 15 m above ground, 23 Jan - 19 Feb 2017) |             |             |             |             |                |             |                |             |                |             |                |             |
|-----------------------------------------------------------------|-------------|-------------|-------------|-------------|----------------|-------------|----------------|-------------|----------------|-------------|----------------|-------------|
|                                                                 | n-alkanals  |             | n-alkanals  |             | n-alkan-2-ones |             | n-alkan-2-ones |             | n-alkan-3-ones |             | n-alkan-3-ones |             |
|                                                                 | P           | SD          | G           | SD          | P              | SD          | G              | SD          | P              | SD          | G              | SD          |
| C <sub>8</sub>                                                  | 28.6        | 10.9        | 5.88        | 3.49        | 0.97           | 0.64        | 4.31           | 1.95        | 0.62           | 0.58        | 1.98           | 1.14        |
| C <sub>9</sub>                                                  | 11.6        | 6.07        | 5.14        | 3.43        | 0.72           | 0.58        | 4.26           | 2.10        | 0.27           | 0.14        | 1.36           | 0.92        |
| C <sub>10</sub>                                                 | 9.11        | 5.06        | 2.99        | 2.47        | 0.69           | 0.57        | 4.37           | 2.46        | 0.13           | 0.09        | 1.62           | 1.08        |
| C <sub>11</sub>                                                 | 1.32        | 0.81        | 1.58        | 1.05        | 0.84           | 0.61        | 3.09           | 1.80        | 0.12           | 0.13        | 0.82           | 0.66        |
| C <sub>12</sub>                                                 | 2.73        | 1.50        | 0.92        | 0.59        | 0.67           | 0.54        | 2.01           | 1.47        | 0.26           | 0.39        | 0.57           | 0.45        |
| C <sub>13</sub>                                                 | 1.45        | 0.98        | 0.39        | 0.35        | 1.41           | 1.01        | 0.90           | 0.79        | 0.23           | 0.21        | 0.42           | 0.33        |
| C <sub>14</sub>                                                 | 1.73        | 1.08        | 0.50        | 0.40        | 1.07           | 0.74        | 1.09           | 0.92        | 0.22           | 0.23        | 0.40           | 0.28        |
| C <sub>15</sub>                                                 | 2.10        | 1.41        | 0.11        | 0.13        | 2.33           | 1.31        | 0.44           | 0.35        | 0.48           | 0.49        | 0.47           | 0.38        |
| C <sub>16</sub>                                                 | 1.98        | 1.21        |             |             | 2.23           | 1.35        | 0.21           | 0.18        | 0.85           | 0.60        | 0.36           | 0.20        |
| C <sub>17</sub>                                                 | 1.20        | 0.86        |             |             | 6.63           | 3.13        | 0.62           | 0.51        | 1.72           | 0.97        |                |             |
| C <sub>18</sub>                                                 | 16.1        | 9.19        |             |             | 7.17           | 3.41        | 0.45           | 0.33        | 0.83           | 0.48        |                |             |
| C <sub>19</sub>                                                 | 4.48        | 3.92        |             |             | 9.03           | 3.86        |                |             |                |             |                |             |
| C <sub>20</sub>                                                 | 1.48        | 1.19        |             |             | 6.21           | 3.12        |                |             |                |             |                |             |
| C <sub>21</sub>                                                 |             |             |             |             | 5.88           | 3.35        |                |             |                |             |                |             |
| C <sub>22</sub>                                                 |             |             |             |             | 4.21           | 3.05        |                |             |                |             |                |             |
| C <sub>23</sub>                                                 |             |             |             |             | 3.13           | 2.35        |                |             |                |             |                |             |
| C <sub>24</sub>                                                 |             |             |             |             | 2.51           | 1.98        |                |             |                |             |                |             |
| C <sub>25</sub>                                                 |             |             |             |             | 1.80           | 1.59        |                |             |                |             |                |             |
| C <sub>26</sub>                                                 |             |             |             |             | 1.02           | 1.06        |                |             |                |             |                |             |
| <b>Average</b>                                                  | <b>6.44</b> | <b>3.40</b> | <b>2.19</b> | <b>1.49</b> | <b>3.08</b>    | <b>1.80</b> | <b>1.98</b>    | <b>1.17</b> | <b>0.52</b>    | <b>0.39</b> | <b>0.89</b>    | <b>0.60</b> |

  

| WM (Westminster University, 20 m above ground, 24 Jan - 20 Feb 2017) |            |      |            |      |                |      |                |      |                |      |                |      |
|----------------------------------------------------------------------|------------|------|------------|------|----------------|------|----------------|------|----------------|------|----------------|------|
|                                                                      | n-alkanals |      | n-alkanals |      | n-alkan-2-ones |      | n-alkan-2-ones |      | n-alkan-3-ones |      | n-alkan-3-ones |      |
|                                                                      | P          | SD   | G          | SD   | P              | SD   | G              | SD   | P              | SD   | G              | SD   |
| C <sub>8</sub>                                                       | 50.3       | 18.7 | 12.4       | 4.33 | 0.94           | 0.66 | 6.15           | 2.57 | 1.47           | 1.05 | 2.84           | 1.61 |
| C <sub>9</sub>                                                       | 12.6       | 6.64 | 8.21       | 5.43 | 0.85           | 0.80 | 4.59           | 2.34 | 0.81           | 0.71 | 2.01           | 1.33 |
| C <sub>10</sub>                                                      | 12.7       | 6.97 | 2.76       | 1.82 | 0.74           | 0.60 | 4.41           | 2.32 | 0.62           | 0.45 | 2.04           | 1.15 |
| C <sub>11</sub>                                                      | 1.74       | 1.53 | 1.05       | 0.89 | 0.81           | 0.69 | 3.22           | 2.31 | 0.62           | 0.61 | 1.09           | 0.76 |
| C <sub>12</sub>                                                      | 3.87       | 2.92 | 1.38       | 0.81 | 0.57           | 0.54 | 1.41           | 0.87 | 0.20           | 0.19 | 0.68           | 0.56 |
| C <sub>13</sub>                                                      | 2.26       | 1.53 | 0.49       | 0.45 | 1.29           | 1.04 | 1.35           | 1.02 | 0.50           | 0.43 | 0.30           | 0.25 |
| C <sub>14</sub>                                                      | 2.73       | 1.78 | 0.87       | 0.71 | 0.75           | 0.81 | 1.61           | 0.97 | 0.20           | 0.16 | 0.58           | 0.36 |
| C <sub>15</sub>                                                      | 3.51       | 2.92 |            |      | 2.89           | 2.06 | 0.51           | 0.33 | 0.89           | 0.52 | 0.41           | 0.23 |
| C <sub>16</sub>                                                      | 2.62       | 2.02 |            |      | 2.84           | 2.15 | 0.33           | 0.29 | 1.21           | 0.64 | 0.11           | 0.17 |
| C <sub>17</sub>                                                      | 1.42       | 1.03 |            |      | 5.16           | 4.40 | 0.85           | 0.68 | 2.05           | 1.15 | 0.19           | 0.30 |
| C <sub>18</sub>                                                      | 17.8       | 11.0 |            |      | 5.37           | 4.32 | 0.96           | 0.73 | 1.79           | 1.51 | 0.01           | 0.08 |
| C <sub>19</sub>                                                      | 2.65       | 2.02 |            |      | 5.98           | 4.98 |                |      |                |      |                |      |
| C <sub>20</sub>                                                      | 3.34       | 2.66 |            |      | 8.26           | 6.93 |                |      |                |      |                |      |
| C <sub>21</sub>                                                      |            |      |            |      | 6.02           | 5.46 |                |      |                |      |                |      |
| C <sub>22</sub>                                                      |            |      |            |      | 5.61           | 5.53 |                |      |                |      |                |      |
| C <sub>23</sub>                                                      |            |      |            |      | 2.76           | 3.11 |                |      |                |      |                |      |
| C <sub>24</sub>                                                      |            |      |            |      | 2.14           | 2.19 |                |      |                |      |                |      |

|                 |             |             |             |             |             |             |             |             |             |             |             |             |  |
|-----------------|-------------|-------------|-------------|-------------|-------------|-------------|-------------|-------------|-------------|-------------|-------------|-------------|--|
| C <sub>25</sub> |             |             |             |             | 1.17        | 1.18        |             |             |             |             |             |             |  |
| C <sub>26</sub> |             |             |             |             | 1.01        | 1.13        |             |             |             |             |             |             |  |
| <b>Average</b>  | <b>9.04</b> | <b>4.75</b> | <b>3.88</b> | <b>2.06</b> | <b>2.90</b> | <b>2.56</b> | <b>2.31</b> | <b>1.31</b> | <b>0.94</b> | <b>0.67</b> | <b>0.93</b> | <b>0.62</b> |  |

EL (Eltham, 23 Feb - 21 Mar 2017)

|                 | n-alkanals  |             | n-alkanals  |             | n-alkan-2-ones |             | n-alkan-2-ones |             | n-alkan-3-ones |             | n-alkan-3-ones |             |  |
|-----------------|-------------|-------------|-------------|-------------|----------------|-------------|----------------|-------------|----------------|-------------|----------------|-------------|--|
|                 | P           | SD          | G           | SD          | P              | SD          | G              | SD          | P              | SD          | G              | SD          |  |
| C <sub>8</sub>  | 53.0        | 22.5        | 4.21        | 1.41        | 1.66           | 0.94        | 5.00           | 2.46        | 1.10           | 0.91        | 2.35           | 1.24        |  |
| C <sub>9</sub>  | 27.6        | 21.5        | 2.32        | 1.36        | 1.81           | 1.93        | 2.95           | 1.80        | 0.92           | 0.99        | 1.15           | 0.87        |  |
| C <sub>10</sub> | 19.3        | 11.6        | 2.02        | 0.96        | 2.56           | 3.28        | 2.82           | 1.66        | 1.01           | 0.79        | 1.14           | 0.66        |  |
| C <sub>11</sub> | 4.56        | 4.72        | 0.68        | 0.51        | 3.81           | 4.51        | 1.46           | 0.95        | 1.31           | 1.15        | 0.80           | 0.29        |  |
| C <sub>12</sub> | 6.75        | 7.02        | 0.52        | 0.49        | 4.76           | 6.24        | 0.95           | 0.73        | 0.73           | 0.95        | 0.37           | 0.27        |  |
| C <sub>13</sub> | 4.75        | 3.43        | 0.22        | 0.16        | 5.44           | 6.32        | 0.88           | 0.65        | 0.90           | 0.92        | 0.47           | 0.32        |  |
| C <sub>14</sub> | 3.94        | 2.43        | 0.37        | 0.36        | 4.07           | 3.30        | 0.68           | 0.53        | 0.52           | 0.54        | 0.36           | 0.30        |  |
| C <sub>15</sub> | 6.22        | 4.05        | 0.21        | 0.19        | 6.30           | 4.27        | 0.37           | 0.30        | 1.84           | 1.19        | 0.34           | 0.27        |  |
| C <sub>16</sub> | 3.29        | 2.92        |             |             | 6.41           | 3.28        | 0.40           | 0.28        | 2.66           | 1.69        | 0.33           | 0.24        |  |
| C <sub>17</sub> | 5.03        | 4.91        |             |             | 10.9           | 5.82        | 0.45           | 0.42        | 1.98           | 1.32        | 0.45           | 0.19        |  |
| C <sub>18</sub> | 22.6        | 18.3        |             |             | 1.56           | 6.16        | 0.45           | 0.31        | 2.26           | 1.48        | 0.40           | 0.57        |  |
| C <sub>19</sub> | 7.46        | 4.58        |             |             | 11.9           | 11.2        |                |             |                |             |                |             |  |
| C <sub>20</sub> | 5.05        | 4.10        |             |             | 8.96           | 7.75        |                |             |                |             |                |             |  |
| C <sub>21</sub> |             |             |             |             | 15.2           | 7.22        |                |             |                |             |                |             |  |
| C <sub>22</sub> |             |             |             |             | 11.1           | 7.34        |                |             |                |             |                |             |  |
| C <sub>23</sub> |             |             |             |             | 13.0           | 9.38        |                |             |                |             |                |             |  |
| C <sub>24</sub> |             |             |             |             | 6.84           | 6.17        |                |             |                |             |                |             |  |
| <b>Average</b>  | <b>13.0</b> | <b>8.62</b> | <b>1.32</b> | <b>0.68</b> | <b>6.84</b>    | <b>5.59</b> | <b>1.49</b>    | <b>0.92</b> | <b>1.38</b>    | <b>1.08</b> | <b>0.74</b>    | <b>0.47</b> |  |

MR (Marylebone road, 22 Mar - 18 Apr 2017)

|                 | n-alkanals |      | n-alkanals |      | n-alkan-2-ones |      | n-alkan-2-ones |      | n-alkan-3-ones |      | n-alkan-3-ones |      |
|-----------------|------------|------|------------|------|----------------|------|----------------|------|----------------|------|----------------|------|
|                 | P          | SD   | G          | SD   | P              | SD   | G              | SD   | P              | SD   | G              | SD   |
| C <sub>8</sub>  | 141        | 68.8 | 15.6       | 5.88 | 4.22           | 3.44 | 10.7           | 3.65 | 2.89           | 1.54 | 3.83           | 2.26 |
| C <sub>9</sub>  | 126        | 74.7 | 14.2       | 4.24 | 3.35           | 2.88 | 9.08           | 3.43 | 1.76           | 1.69 | 2.74           | 1.82 |
| C <sub>10</sub> | 99.9       | 46.6 | 8.99       | 4.16 | 12.1           | 5.21 | 7.72           | 3.67 | 0.80           | 0.74 | 3.13           | 1.76 |
| C <sub>11</sub> | 26.0       | 13.5 | 3.76       | 2.93 | 4.69           | 3.96 | 4.66           | 2.42 | 0.88           | 0.64 | 1.78           | 0.56 |
| C <sub>12</sub> | 38.6       | 22.3 | 2.92       | 2.52 | 22.3           | 8.02 | 2.90           | 1.71 | 0.63           | 0.50 | 1.61           | 0.39 |
| C <sub>13</sub> | 36.0       | 20.1 | 1.46       | 1.08 | 11.7           | 4.06 | 1.64           | 0.92 | 1.38           | 1.09 | 1.61           | 0.38 |
| C <sub>14</sub> | 35.6       | 17.0 | 1.78       | 1.61 | 41.6           | 12.7 | 1.78           | 0.91 | 3.29           | 2.38 | 1.28           | 0.49 |
| C <sub>15</sub> | 76.1       | 30.0 |            |      | 23.6           | 10.3 | 0.75           | 0.40 | 6.31           | 2.84 | 1.22           | 0.29 |
| C <sub>16</sub> | 41.0       | 22.5 |            |      | 14.4           | 7.90 | 0.54           | 0.25 | 7.53           | 3.70 | 1.03           | 0.24 |
| C <sub>17</sub> | 21.9       | 11.7 |            |      | 14.0           | 7.12 | 0.59           | 0.46 | 5.64           | 3.52 | 0.77           | 0.18 |
| C <sub>18</sub> | 10.7       | 8.76 |            |      | 9.68           | 6.61 | 0.78           | 0.62 | 4.64           | 2.82 | 0.63           | 0.23 |
| C <sub>19</sub> | 17.5       | 10.7 |            |      | 3.56           | 2.93 |                |      | 4.35           | 1.91 |                |      |
| C <sub>20</sub> | 5.47       | 4.28 |            |      | 7.78           | 6.17 |                |      |                |      |                |      |
| C <sub>21</sub> |            |      |            |      | 4.01           | 4.41 |                |      |                |      |                |      |
| C <sub>22</sub> |            |      |            |      | 5.12           | 4.40 |                |      |                |      |                |      |
| C <sub>23</sub> |            |      |            |      | 2.65           | 2.73 |                |      |                |      |                |      |
| C <sub>24</sub> |            |      |            |      | 5.89           | 4.71 |                |      |                |      |                |      |

13  
14

Table S2. The ratios of n-alkan-2-ones/n-alkanes, and n-alkan-3-ones/n-alkanes with same carbon numbers.

| n-alkan-2-ones/n-alkanes, % |      |      |      |                 |                 |
|-----------------------------|------|------|------|-----------------|-----------------|
| Carbon numbers              | RU   | WM   | EL   | MR              |                 |
|                             |      |      |      | Northerly winds | Southerly winds |
| C11                         | 2.18 | 1.35 | 3.60 | 2.13            | 2.57            |
| C12                         | 2.42 | 1.17 | 5.73 | 9.32            | 12.5            |
| C13                         | 1.78 | 1.53 | 4.00 | 4.30            | 5.16            |
| C14                         | 1.41 | 1.10 | 2.62 | 12.2            | 17.7            |
| C15                         | 3.07 | 2.92 | 7.09 | 8.42            | 11.2            |
| C16                         | 2.79 | 2.52 | 6.20 | 5.81            | 6.97            |
| C17                         | 9.56 | 7.00 | 13.3 | 11.8            | 12.6            |
| C18                         | 13.2 | 9.31 | 4.54 | 7.21            | 8.27            |
| C19                         | 27.8 | 11.9 | 23.3 | 3.70            | 2.95            |
| C20                         | 24.6 | 21.4 | 18.7 | 8.34            | 8.84            |
| C21                         | 14.6 | 9.71 | 20.4 | 3.21            | 3.92            |
| C22                         | 12.2 | 9.83 | 18.9 | 4.31            | 2.86            |
| C23                         | 5.41 | 3.48 | 19.1 | 3.41            | 1.51            |
| C24                         | 5.85 | 3.38 | 14.0 | 4.70            | 3.16            |
| C25                         | 4.78 | 2.43 |      |                 |                 |
| C26                         | 3.10 | 2.24 |      |                 |                 |
| <b>averages</b>             | 8.41 | 5.70 | 11.5 | 6.35            | 7.16            |
| <b>min</b>                  | 1.41 | 1.10 | 2.62 | 2.13            | 1.51            |
| <b>max</b>                  | 27.8 | 21.4 | 23.3 | 12.2            | 17.7            |

15

| n-alkan-3-ones/n-alkanes, % |      |      |      |                 |                 |
|-----------------------------|------|------|------|-----------------|-----------------|
| Carbon numbers              | RU   | WM   | EL   | MR              |                 |
|                             |      |      |      | Northerly winds | Southerly winds |
| C11                         | 0.53 | 0.57 | 1.36 | 0.58            | 0.77            |
| C12                         | 0.75 | 0.52 | 1.11 | 0.80            | 1.20            |
| C13                         | 0.50 | 0.46 | 0.87 | 0.99            | 1.31            |
| C14                         | 0.41 | 0.37 | 0.48 | 1.37            | 1.94            |
| C15                         | 1.05 | 1.11 | 2.32 | 2.45            | 4.67            |
| C16                         | 1.38 | 1.05 | 2.72 | 2.90            | 4.39            |
| C17                         | 2.27 | 2.60 | 2.86 | 4.45            | 6.90            |
| C18                         | 1.44 | 2.65 | 6.01 | 3.04            | 5.94            |
| C19                         |      |      |      | 3.62            | 4.73            |
| <b>averages</b>             | 1.04 | 1.17 | 2.22 | 2.24            | 3.54            |
| <b>min</b>                  | 0.41 | 0.37 | 0.48 | 0.58            | 0.77            |
| <b>max</b>                  | 2.27 | 2.65 | 6.01 | 4.45            | 6.90            |

16

17

18

19

20 Table S3. The regression equations between black carbon (BC) and n-alkanals, NO<sub>x</sub> and n-alkanals.

21  $C_{n\text{-alkanals}} = m C_{BC} + b$

| Carbon atoms   | RU    |      |                | WM    |      |                | MR              |      |                |                 |       |                |
|----------------|-------|------|----------------|-------|------|----------------|-----------------|------|----------------|-----------------|-------|----------------|
|                | m     | b    | r <sup>2</sup> | m     | b    | r <sup>2</sup> | Northerly Winds |      |                | Southerly winds |       |                |
|                |       |      |                |       |      |                | m               | b    | r <sup>2</sup> | m               | b     | r <sup>2</sup> |
| C8             | -0.43 | 34.3 | 0.00           | -5.30 | 73.5 | 0.03           | 40.5            | 30.7 | 0.27           | 39.6            | 17.5  | 0.49           |
| C9             | -3.88 | 21.2 | 0.06           | -0.63 | 21.5 | 0.00           | 18.6            | 71.2 | 0.09           | 57.0            | -108  | 0.61           |
| C10            | -2.00 | 14.5 | 0.02           | -1.55 | 18.3 | 0.02           | 4.39            | 95.7 | 0.05           | 36.2            | -48.8 | 0.53           |
| C11            | 0.11  | 2.28 | 0.00           | -0.18 | 3.25 | 0.01           | -0.33           | 27.4 | 0.02           | 12.6            | -25.2 | 0.57           |
| C12            | -1.25 | 5.23 | 0.11           | -0.17 | 5.84 | 0.00           | 2.17            | 30.1 | 0.02           | 20.7            | -47.3 | 0.56           |
| C13            | -0.10 | 1.87 | 0.00           | 0.01  | 2.84 | 0.00           | -4.36           | 46.7 | 0.09           | 12.6            | -12.7 | 0.58           |
| C14            | -0.23 | 2.48 | 0.02           | 0.11  | 3.60 | 0.00           | 6.37            | 19.5 | 0.18           | 9.57            | -0.65 | 0.49           |
| C15            | -0.33 | 2.57 | 0.01           | -0.69 | 5.25 | 0.02           | 6.59            | 57.0 | 0.12           | 18.3            | 5.08  | 0.43           |
| C16            | 0.85  | 0.81 | 0.09           | -0.01 | 2.75 | 0.00           | 5.57            | 29.6 | 0.08           | 8.18            | 9.85  | 0.28           |
| C17            | -0.35 | 1.66 | 0.04           | 0.05  | 1.33 | 0.00           | 4.73            | 4.67 | 0.31           | 5.79            | 0.94  | 0.35           |
| C18            | -6.42 | 25.2 | 0.10           | -1.90 | 21.7 | 0.01           | 0.81            | 6.19 | 0.03           | 8.61            | -26.2 | 0.44           |
| C19            | -2.80 | 7.88 | 0.15           | -0.35 | 3.38 | 0.01           | 3.74            | 4.81 | 0.50           | 7.08            | -9.39 | 0.38           |
| C20            | 0.11  | 1.33 | 0.00           | -1.04 | 5.44 | 0.07           | 0.79            | 2.18 | 0.14           | 2.38            | -3.11 | 0.34           |
| <b>Average</b> |       |      | 0.05           |       |      | 0.01           |                 |      | 0.15           |                 |       | 0.47           |
| <b>Min</b>     | -6.42 | 0.81 | 0.00           | -5.30 | 1.33 | 0.00           | -4.36           | 2.18 | 0.02           | 2.38            | -108  | 0.28           |
| <b>Max</b>     | 0.85  | 34.3 | 0.15           | 0.11  | 73.5 | 0.07           | 40.5            | 95.7 | 0.50           | 57.02           | 17.5  | 0.61           |

22

23  $C_{n\text{-alkanals}} = m C_{NO_x} + b$

| Carbon atoms   | EL    |      |                | MR              |      |                |                 |       |                |
|----------------|-------|------|----------------|-----------------|------|----------------|-----------------|-------|----------------|
|                | m     | b    | r <sup>2</sup> | Northerly Winds |      |                | Southerly winds |       |                |
|                |       |      |                | m               | b    | r <sup>2</sup> | m               | b     | r <sup>2</sup> |
| C8             | -0.75 | 72.9 | 0.12           | 0.67            | 27.4 | 0.21           | 0.53            | 32.8  | 0.50           |
| C9             | 1.05  | 4.38 | 0.31           | 0.38            | 54.4 | 0.06           | 0.56            | -5.49 | 0.48           |
| C10            | 0.44  | 10.4 | 0.16           | 0.11            | 83.2 | 0.01           | 0.36            | 13.0  | 0.42           |
| C11            | 0.16  | 1.48 | 0.13           | 0.01            | 25.6 | 0.01           | 0.11            | 1.73  | 0.49           |
| C12            | 0.06  | 5.51 | 0.01           | 0.14            | 13.1 | 0.19           | 0.18            | -2.49 | 0.45           |
| C13            | 0.08  | 2.92 | 0.07           | -0.02           | 35.3 | 0.01           | 0.14            | 1.35  | 0.38           |
| C14            | 0.03  | 3.59 | 0.02           | 0.15            | 12.1 | 0.23           | 0.13            | 4.64  | 0.35           |
| C15            | 0.00  | 6.14 | 0.00           | 0.20            | 39.9 | 0.15           | 0.14            | 47.4  | 0.15           |
| C16            | 0.07  | 1.72 | 0.07           | 0.18            | 17.0 | 0.20           | 0.11            | 11.0  | 0.12           |
| C17            | -0.09 | 7.04 | 0.05           | 0.08            | 4.19 | 0.28           | 0.05            | 11.4  | 0.11           |
| C18            | -0.49 | 34.1 | 0.09           | 0.02            | 5.64 | 0.03           | 0.07            | -8.65 | 0.30           |
| C19            | 0.05  | 6.24 | 0.02           | 3.74            | 4.81 | 0.50           | 0.07            | 1.14  | 0.23           |
| C20            | -0.06 | 6.33 | 0.03           | 0.00            | 3.28 | 0.01           | 0.03            | -2.08 | 0.24           |
| <b>Average</b> |       |      | 0.08           |                 |      | 0.15           |                 |       | 0.32           |
| <b>Min</b>     | -0.75 | 1.48 | 0.00           | -0.02           | 3.28 | 0.01           | 0.03            | -8.65 | 0.11           |
| <b>Max</b>     | 1.05  | 72.9 | 0.31           | 3.74            | 83.2 | 0.50           | 0.56            | 47.4  | 0.50           |

24

25

26 Table S4. Analysis of n-alkanals, alkan-2-ones and alkan-3-ones partitioning, all compounds, daily  
 27 data at RU, WM, El and MR sites.

| RU             |      |                                             |       |                |                                                 |       |                |                                                 |       |                |
|----------------|------|---------------------------------------------|-------|----------------|-------------------------------------------------|-------|----------------|-------------------------------------------------|-------|----------------|
| Date           | Temp | alkanals (C <sub>8</sub> -C <sub>14</sub> ) |       |                | alkan-2-ones (C <sub>8</sub> -C <sub>18</sub> ) |       |                | alkan-3-ones (C <sub>8</sub> -C <sub>16</sub> ) |       |                |
|                | °C   | m                                           | b     | r <sup>2</sup> | m                                               | b     | r <sup>2</sup> | m                                               | b     | r <sup>2</sup> |
| 26/01/2017     | 0.41 | -0.28                                       | -5.50 | 0.25           | -1.02                                           | -7.27 | 0.54           | -0.41                                           | -6.54 | 0.21           |
| 27/01/2017     | 7.17 | -0.62                                       | -5.30 | 0.37           | -1.75                                           | -7.56 | 0.89           | -1.42                                           | -8.20 | 0.35           |
| 28/01/2017     | 5.44 | -0.55                                       | -5.23 | 0.39           | -1.79                                           | -7.03 | 0.84           | -1.81                                           | -8.04 | 0.53           |
| 29/01/2017     | 8.28 | -0.11                                       | -4.97 | <0.01          | -1.69                                           | -6.36 | 0.89           | -1.47                                           | -6.86 | 0.29           |
| 03/02/2017     | 5.58 | -0.10                                       | -5.06 | 0.21           | -1.90                                           | -7.71 | 0.87           | -1.96                                           | -8.28 | 0.90           |
| 04/02/2017     | 5.15 | -1.95                                       | -6.37 | 0.37           | -1.92                                           | -7.82 | 0.94           | -2.11                                           | -8.82 | 0.59           |
| 05/02/2017     | 3.70 | -1.21                                       | -6.14 | 0.15           | -2.15                                           | -8.59 | 0.89           | -1.79                                           | -8.53 | 0.57           |
| 06/02/2017     | 6.30 | -0.75                                       | -4.04 | 0.36           | -2.00                                           | -9.39 | 0.87           | -1.16                                           | -7.79 | 0.45           |
| 07/02/2017     | 5.60 | -1.45                                       | -2.78 | 0.17           | -1.59                                           | -9.13 | 0.78           | -1.01                                           | -7.75 | 0.45           |
| 08/02/2017     | 2.84 | -2.78                                       | -2.08 | 0.58           | -1.49                                           | -9.06 | 0.74           | -1.90                                           | -9.30 | 0.68           |
| 09/02/2017     | 1.65 | -0.99                                       | -6.73 | 0.28           | -1.78                                           | -9.86 | 0.86           | -1.70                                           | -9.61 | 0.40           |
| 10/02/2017     | 1.38 | -0.13                                       | -5.21 | <0.01          | -1.74                                           | -8.69 | 0.73           | -0.70                                           | -7.09 | 0.14           |
| 11/02/2017     | 2.30 | -1.21                                       | -6.60 | 0.31           | -1.64                                           | -9.20 | 0.79           | -1.20                                           | -8.14 | 0.18           |
| 12/02/2017     | 5.67 | -1.45                                       | -2.67 | 0.31           | -1.53                                           | -9.30 | 0.08           | -1.74                                           | -9.86 | 0.42           |
| 13/02/2017     | 5.60 | -1.80                                       | -2.23 | 0.27           | -1.73                                           | -9.61 | 0.82           | -1.92                                           | -10.6 | 0.66           |
| 14/02/2017     | 9.51 | -0.77                                       | -5.94 | 0.12           | -2.05                                           | -9.57 | 0.85           | -1.18                                           | -8.13 | 0.20           |
| 15/02/2017     | 7.96 | -1.36                                       | -3.90 | 0.11           | -1.59                                           | -8.09 | 0.82           | -0.93                                           | -7.05 | 0.26           |
| 17/02/2017     | 7.83 | -0.28                                       | -4.65 | 0.21           | -1.91                                           | -9.58 | 0.87           | -1.79                                           | -9.70 | 0.26           |
| 18/02/2017     | 7.72 | -0.73                                       | -4.04 | 0.38           | -1.49                                           | -8.86 | 0.77           | -1.18                                           | -8.19 | 0.32           |
| 19/02/2017     | 11.4 | -0.28                                       | -4.88 | 0.21           | -2.25                                           | -8.93 | 0.75           | -1.06                                           | -7.31 | 0.20           |
| <b>Average</b> |      |                                             |       | 0.25           |                                                 |       | 0.78           |                                                 |       | 0.40           |
| <b>Min</b>     |      | -2.78                                       |       |                | -2.25                                           |       |                | -2.11                                           |       |                |
| <b>Max</b>     |      | -0.1                                        |       |                | -1.02                                           |       |                | -0.41                                           |       |                |

28

| WM             |      |                                             |       |                |                                                 |       |                |                                                 |       |                |
|----------------|------|---------------------------------------------|-------|----------------|-------------------------------------------------|-------|----------------|-------------------------------------------------|-------|----------------|
| Date           | Temp | alkanals (C <sub>8</sub> -C <sub>14</sub> ) |       |                | alkan-2-ones (C <sub>8</sub> -C <sub>18</sub> ) |       |                | alkan-3-ones (C <sub>8</sub> -C <sub>16</sub> ) |       |                |
|                | °C   | m                                           | b     | r <sup>2</sup> | m                                               | b     | r <sup>2</sup> | m                                               | b     | r <sup>2</sup> |
| 26/01/2017     | 0.41 | -2.52                                       | -1.68 | 0.38           | -1.81                                           | -9.37 | 0.76           | -1.23                                           | -8.42 | 0.26           |
| 27/01/2017     | 7.17 | -1.09                                       | -6.23 | 0.29           | -1.48                                           | -8.45 | 0.79           | -0.83                                           | -6.95 | 0.23           |
| 28/01/2017     | 5.44 | -0.74                                       | -5.74 | 0.23           | -2.22                                           | -7.65 | 0.92           | -1.75                                           | -7.27 | 0.76           |
| 29/01/2017     | 8.28 | -2.38                                       | -6.45 | 0.22           | -1.92                                           | -7.62 | 0.71           | -0.79                                           | -6.51 | 0.28           |
| 03/02/2017     | 5.58 | -0.74                                       | -4.94 | 0.03           | -1.72                                           | 6.34  | 0.90           | -1.15                                           | -6.77 | 0.14           |
| 04/02/2017     | 5.15 | -2.38                                       | -6.45 | 0.22           | -1.72                                           | -6.34 | 0.90           | -0.52                                           | -6.14 | 0.07           |
| 05/02/2017     | 3.70 | -1.59                                       | -5.70 | 0.38           | -2.09                                           | -7.37 | 0.93           | -1.53                                           | -7.38 | 0.21           |
| 06/02/2017     | 6.30 | -0.41                                       | -5.19 | 0.31           | -1.61                                           | -7.74 | 0.64           | -1.02                                           | -4.02 | 0.13           |
| 07/02/2017     | 5.60 | -0.19                                       | -4.85 | <0.01          | -1.88                                           | -9.66 | 0.81           | -1.73                                           | -9.02 | 0.41           |
| 08/02/2017     | 2.84 | -1.04                                       | -6.34 | 0.16           | -1.83                                           | -8.76 | 0.91           | -1.39                                           | -8.25 | 0.63           |
| 09/02/2017     | 1.65 | -1.63                                       | -6.47 | 0.28           | -2.13                                           | -8.28 | 0.92           | -0.96                                           | -7.03 | 0.28           |
| 10/02/2017     | 1.38 | -1.99                                       | -7.31 | 0.30           | -1.87                                           | -9.17 | 0.93           | -1.06                                           | -7.35 | 0.19           |
| 11/02/2017     | 2.30 | -0.75                                       | -6.26 | 0.34           | -1.90                                           | -9.44 | 0.85           | -2.17                                           | -8.66 | 0.21           |
| 12/02/2017     | 5.67 | -0.72                                       | -6.11 | 0.12           | -1.85                                           | -9.51 | 0.86           | -0.70                                           | -7.12 | 0.12           |
| 13/02/2017     | 5.60 | -0.51                                       | -4.41 | 0.23           | -1.86                                           | -9.31 | 0.87           | -1.09                                           | -7.77 | 0.18           |
| 14/02/2017     | 9.51 | -1.53                                       | -2.29 | 0.18           | -2.17                                           | -10.8 | 0.83           | -0.47                                           | -6.40 | 0.02           |
| 15/02/2017     | 7.96 | -0.68                                       | -4.56 | 0.37           | -2.31                                           | -8.41 | 0.91           | -1.09                                           | -6.90 | 0.35           |
| 16/02/2017     | 9.27 | -0.57                                       | -5.42 | 0.16           | -2.31                                           | -8.80 | 0.80           | -1.74                                           | -8.06 | 0.47           |
| 17/02/2017     | 7.83 | -0.81                                       | -5.94 | 0.19           | -2.25                                           | -10.0 | 0.86           | -1.12                                           | -7.86 | 0.29           |
| 18/02/2017     | 7.72 | -0.44                                       | -5.61 | 0.13           | -1.79                                           | -9.72 | 0.88           | -1.54                                           | -8.50 | 0.36           |
| 19/02/2017     | 11.4 | -1.49                                       | -3.66 | 0.33           | -1.60                                           | -7.41 | 0.86           | -1.66                                           | -7.27 | 0.68           |
| <b>Average</b> |      |                                             |       | 0.23           |                                                 |       | 0.85           |                                                 |       | 0.30           |
| <b>Min</b>     |      | -2.52                                       |       |                | -2.31                                           |       |                | -2.17                                           |       |                |
| <b>Max</b>     |      | -0.19                                       |       |                | -1.48                                           |       |                | -0.47                                           |       |                |

29

30

31

32

33

| EI             |      |                                              |       |                |                                                 |       |                |                                                 |       |                |
|----------------|------|----------------------------------------------|-------|----------------|-------------------------------------------------|-------|----------------|-------------------------------------------------|-------|----------------|
| Date           | Temp | alkanalns (C <sub>8</sub> -C <sub>14</sub> ) |       |                | alkan-2-ones (C <sub>8</sub> -C <sub>18</sub> ) |       |                | alkan-3-ones (C <sub>8</sub> -C <sub>16</sub> ) |       |                |
|                | °C   | m                                            | b     | r <sup>2</sup> | m                                               | b     | r <sup>2</sup> | m                                               | b     | r <sup>2</sup> |
| 23/02/2017     | 5.20 | -0.22                                        | -5.04 | <0.01          | -1.92                                           | -6.70 | 0.78           | -1.30                                           | -6.95 | 0.52           |
| 24/02/2017     | 5.58 | -3.53                                        | -5.31 | 0.16           | -1.64                                           | -7.09 | 0.84           | -1.66                                           | -7.18 | 0.83           |
| 25/02/2017     | 9.36 | -1.06                                        | -4.00 | 0.24           | -1.84                                           | -5.42 | 0.69           | -0.25                                           | -5.67 | 0.03           |
| 26/02/2017     | 9.82 | -0.22                                        | -4.98 | <0.01          | -1.78                                           | -6.49 | 0.90           | -1.02                                           | -6.02 | 0.37           |
| 27/02/2017     | 4.16 | -0.45                                        | -5.32 | 0.31           | -1.37                                           | -6.63 | 0.92           | -0.78                                           | -6.59 | 0.09           |
| 28/02/2017     | 5.55 | -0.06                                        | -5.04 | <0.01          | -1.48                                           | -7.98 | 0.92           | -1.48                                           | -7.61 | 0.25           |
| 01/03/2017     | 6.57 | -1.49                                        | -5.27 | 0.19           | -1.53                                           | -7.07 | 0.85           | -1.59                                           | -7.33 | 0.80           |
| 02/03/2017     | 5.77 | -0.44                                        | -5.21 | 0.32           | -1.54                                           | -6.80 | 0.94           | -1.40                                           | -6.75 | 0.52           |
| 03/03/2017     | 8.09 | -4.88                                        | -1.87 | 0.70           | -2.75                                           | -9.01 | 0.55           | -0.33                                           | -6.08 | 0.02           |
| 04/03/2017     | 6.98 | -1.75                                        | -4.69 | 0.20           | -2.14                                           | -7.47 | 0.81           | -0.12                                           | -5.64 | <0.01          |
| 05/03/2017     | 6.19 | -1.32                                        | -5.01 | 0.25           | -1.56                                           | -6.87 | 0.95           | -1.11                                           | -6.77 | 0.35           |
| 06/03/2017     | 5.13 | -1.03                                        | -5.75 | 0.26           | -1.67                                           | -7.70 | 0.74           | -1.24                                           | -7.01 | 0.43           |
| 07/03/2017     | 8.12 | -1.30                                        | -4.25 | 0.14           | -2.21                                           | -6.57 | 0.73           | -1.04                                           | -6.17 | 0.33           |
| 08/03/2017     | 9.89 | -0.29                                        | -4.71 | <0.01          | -1.64                                           | -7.39 | 0.88           | -1.09                                           | -6.68 | 0.32           |
| 09/03/2017     | 6.83 | -6.67                                        | -4.56 | 0.73           | -1.95                                           | -7.04 | 0.76           | -1.23                                           | -6.57 | 0.20           |
| 10/03/2017     | 7.69 | -1.04                                        | -4.85 | 0.33           | -2.27                                           | -7.57 | 0.68           | -2.25                                           | -7.31 | 0.33           |
| 11/03/2017     | 7.12 | -0.83                                        | -4.83 | 0.31           | -2.63                                           | -7.12 | 0.61           | -1.28                                           | -6.62 | 0.51           |
| 12/03/2017     | 7.50 | -1.63                                        | -4.86 | 0.24           | -2.00                                           | -6.30 | 0.49           | -0.52                                           | -4.52 | 0.07           |
| 13/03/2017     | 8.21 | -0.72                                        | -4.55 | 0.31           | -1.91                                           | -6.20 | 0.88           | -1.32                                           | -6.47 | 0.59           |
| 14/03/2017     | 7.88 | -0.04                                        | -4.85 | <0.01          | -1.57                                           | -6.76 | 0.52           | -1.38                                           | -6.70 | 0.56           |
| 15/03/2017     | 8.04 | -0.66                                        | -5.09 | 0.22           | -1.80                                           | -6.93 | 0.73           | -1.45                                           | -6.70 | 0.56           |
| 16/03/2017     | 7.37 | -0.70                                        | -5.13 | 0.30           | -1.32                                           | -7.42 | 0.49           | -0.65                                           | -6.48 | 0.06           |
| 17/03/2017     | 10.2 | -1.61                                        | -4.17 | 0.78           | -1.94                                           | -7.28 | 0.54           | -0.49                                           | -5.76 | 0.04           |
| 18/03/2017     | 11.1 | -0.26                                        | -4.81 | 0.32           | -1.47                                           | -7.12 | 0.43           | -1.33                                           | -6.96 | 0.65           |
| 19/03/2017     | 11.1 | -1.71                                        | -4.47 | 0.58           | -2.70                                           | -7.77 | 0.78           | -0.48                                           | -6.03 | 0.08           |
| 21/03/2017     | 6.53 | -4.98                                        | -3.47 | 0.70           | -2.56                                           | -6.53 | 0.73           | -0.24                                           | -5.84 | 0.01           |
| <b>Average</b> |      |                                              |       | 0.31           |                                                 |       | 0.74           |                                                 |       | 0.34           |
| <b>Min</b>     |      | -6.67                                        |       |                | -2.75                                           |       |                | -2.25                                           |       |                |
| <b>Max</b>     |      | -0.04                                        |       |                | -1.32                                           |       |                | -0.12                                           |       |                |

34

| MR             |      |                                              |       |                |                                                 |       |                |                                                 |       |                |
|----------------|------|----------------------------------------------|-------|----------------|-------------------------------------------------|-------|----------------|-------------------------------------------------|-------|----------------|
| Date           | Temp | alkanalns (C <sub>8</sub> -C <sub>14</sub> ) |       |                | alkan-2-ones (C <sub>8</sub> -C <sub>18</sub> ) |       |                | alkan-3-ones (C <sub>8</sub> -C <sub>16</sub> ) |       |                |
|                | °C   | m                                            | b     | r <sup>2</sup> | m                                               | b     | r <sup>2</sup> | m                                               | b     | r <sup>2</sup> |
| 22/03/2017     | 8.01 | -2.42                                        | -4.14 | 0.93           | -1.15                                           | -6.16 | 0.45           | -0.92                                           | -6.62 | 0.36           |
| 23/03/2017     | 8.64 | -1.59                                        | -4.74 | 0.79           | -1.31                                           | -8.00 | 0.61           | -2.07                                           | -8.47 | 0.73           |
| 24/03/2017     | 9.01 | -3.45                                        | -7.79 | 0.90           | -1.29                                           | -7.65 | 0.70           | -2.00                                           | -9.04 | 0.85           |
| 25/03/2017     | 10.1 | -1.50                                        | -5.30 | 0.55           | -1.46                                           | -6.85 | 0.70           | -1.49                                           | -7.52 | 0.37           |
| 26/03/2017     | 9.95 | -1.98                                        | -4.14 | 0.25           | -1.67                                           | -6.13 | 0.79           | -1.36                                           | -6.86 | 0.64           |
| 27/03/2017     | 10.5 | -0.33                                        | -5.16 | 0.31           | -1.61                                           | -7.45 | 0.87           | -1.62                                           | -7.36 | 0.39           |
| 28/03/2017     | 13.1 | -3.35                                        | -5.19 | 0.78           | -1.67                                           | -6.46 | 0.84           | -1.62                                           | -7.36 | 0.37           |
| 29/03/2017     | 13.7 | -1.78                                        | -4.68 | 0.68           | -1.77                                           | -6.56 | 0.64           | -2.32                                           | -7.96 | 0.40           |
| 30/03/2017     | 15.5 | -0.77                                        | -5.04 | 0.45           | -2.02                                           | -7.36 | 0.81           | -1.33                                           | -7.25 | 0.76           |
| 31/03/2017     | 11.9 | -1.52                                        | -5.05 | 0.53           | -2.41                                           | -7.06 | 0.89           | -2.59                                           | -8.71 | 0.60           |
| 01/04/2017     | 10.8 | -1.73                                        | -5.41 | 0.42           | -1.77                                           | -7.64 | 0.54           | -0.65                                           | -6.46 | 0.35           |
| 02/04/2017     | 11.1 | -2.02                                        | -5.64 | 0.35           | -1.89                                           | -6.91 | 0.76           | -0.88                                           | -6.57 | 0.35           |
| 03/04/2017     | 12.3 | -0.63                                        | -5.13 | 0.33           | -1.62                                           | -7.10 | 0.55           | -1.32                                           | -7.39 | 0.31           |
| 04/04/2017     | 10.8 | -1.52                                        | -4.25 | 0.29           | -1.60                                           | -5.90 | 0.73           | -2.49                                           | -7.16 | 0.47           |
| 05/04/2017     | 10.8 | -1.99                                        | -4.84 | 0.87           | -1.24                                           | -6.31 | 0.57           | -1.73                                           | -7.77 | 0.42           |
| 06/04/2017     | 12.0 | -3.97                                        | -6.07 | 0.63           | -1.88                                           | -7.61 | 0.72           | -1.93                                           | -8.27 | 0.61           |
| 07/04/2017     | 12.4 | -0.57                                        | -5.46 | 0.51           | -1.96                                           | -8.01 | 0.72           | -0.51                                           | -6.52 | 0.37           |
| 08/04/2017     | 15.3 | -1.17                                        | -3.91 | 0.37           | -1.42                                           | -7.39 | 0.72           | -1.26                                           | -7.48 | 0.34           |
| 09/04/2017     | 15.1 | -1.37                                        | -5.77 | 0.25           | -1.41                                           | -7.11 | 0.64           | -1.31                                           | -7.80 | 0.76           |
| 10/04/2017     | 10.4 | -2.36                                        | -5.53 | 0.48           | -1.52                                           | -6.33 | 0.80           | -1.18                                           | -7.23 | 0.35           |
| 11/04/2017     | 11.3 | -0.15                                        | -4.88 | 0.31           | -1.64                                           | -6.77 | 0.77           | -1.31                                           | -7.21 | 0.58           |
| 12/04/2017     | 11.8 | -1.51                                        | -5.08 | 0.26           | -1.46                                           | -6.69 | 0.77           | -1.81                                           | -8.05 | 0.54           |
| 13/04/2017     | 11.2 | -3.52                                        | -5.16 | 0.47           | -1.72                                           | -6.92 | 0.77           | -1.47                                           | -7.56 | 0.59           |
| 14/04/2017     | 12.0 | -1.98                                        | -4.18 | 0.58           | -1.11                                           | -7.16 | 0.70           | -2.20                                           | -8.74 | 0.53           |
| 15/04/2017     | 10.7 | -1.94                                        | -4.86 | 0.47           | -1.15                                           | -6.31 | 0.48           | -0.62                                           | -6.36 | 0.41           |
| 16/04/2017     | 11.0 | -3.29                                        | -4.44 | 0.45           | -1.36                                           | -6.04 | 0.47           | -1.25                                           | -7.29 | 0.46           |
| 18/04/2017     | 9.01 | -0.89                                        | -4.89 | 0.25           | -1.72                                           | -6.33 | 0.84           | -2.45                                           | -7.97 | 0.57           |
| <b>Average</b> |      |                                              |       | 0.50           |                                                 |       | 0.70           |                                                 |       | 0.50           |
| <b>Min</b>     |      | -3.97                                        |       |                | -2.41                                           |       |                | -2.59                                           |       |                |
| <b>Max</b>     |      | -0.15                                        |       |                | -1.15                                           |       |                | -0.51                                           |       |                |

35
